# Supplementary material for: Retrospective Genotyping of Enteroviruses Using a Diagnostic Nanopore Sequencing Workflow
Source: MDPI journal article supplement (doi:10.3390/pathogens13050390), 2024-05-08
Supplement: s1 [file s1]

## Supplementary Material

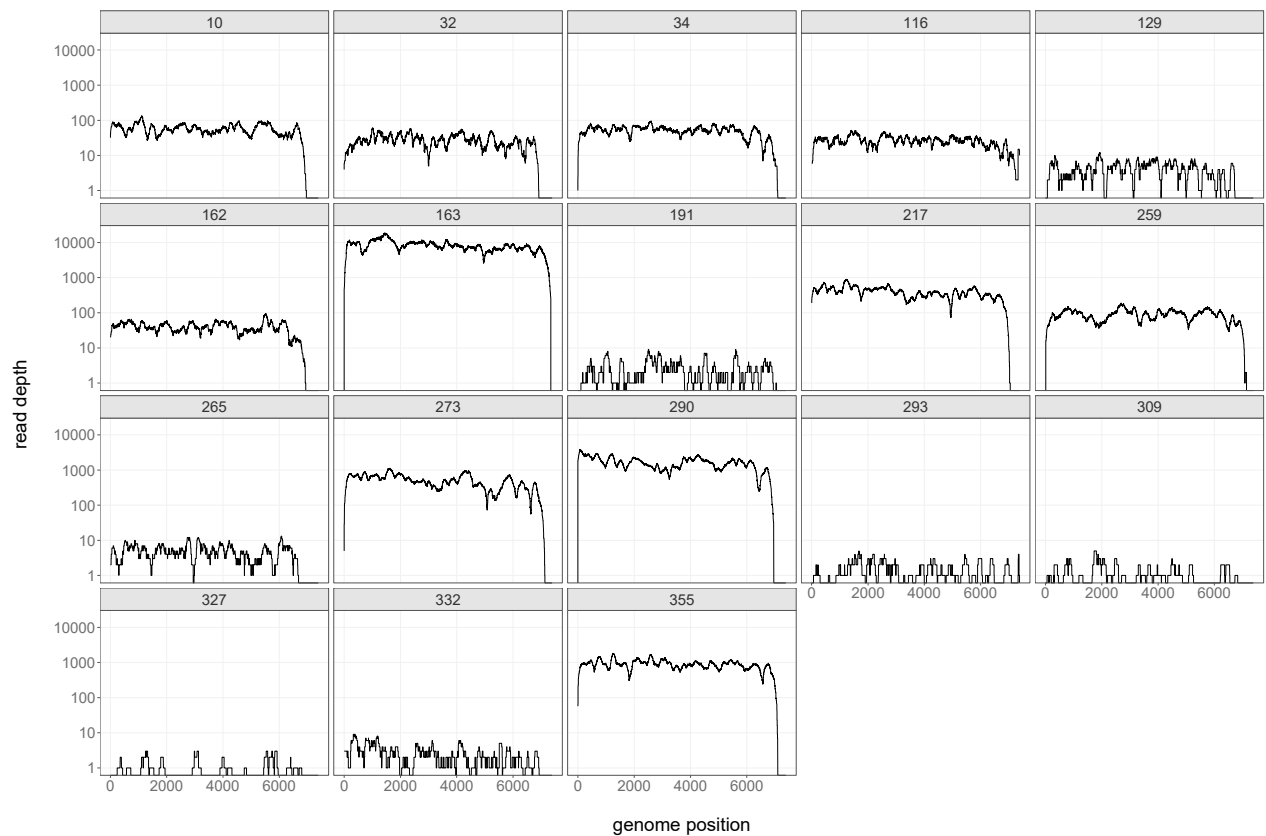

**Supplementary Figure S1.** Coverage plots of 18 samples sequenced using an untargeted whole genome approach.

**Supplementary Table S1.** Patient and sample characteristics, sequencing and qPCR results of all analyzed samples. N/A in the column Species refers to unsuccessful genotyping. N/A in the qPCR columns indicates undetectable viral loads.

| #  | Study number | Host age | Sampling Date<br>YYYY/MM | material_class       | Season<br>respiratory | Species      | Genotype | Double<br>infections | qPCR<br>ct_entero | qPCR<br>ct_rhino |
|----|--------------|----------|--------------------------|----------------------|-----------------------|--------------|----------|----------------------|-------------------|------------------|
| 1  | 1            | 67       | 2019/09                  | Respiratory specimen | 2019/2020             | Rhinovirus B | RV-B14   |                      | NA                | 28.24            |
| 2  | 3            | 26       | 2019/09                  | Respiratory specimen | 2019/2020             | Rhinovirus A | RV-A67   |                      | NA                | 21.59            |
| 3  | 4            | 67       | 2019/09                  | Respiratory specimen | 2019/2020             | Rhinovirus A | RV-A21   |                      | NA                | 28.32            |
| 4  | 5            | 62       | 2019/09                  | Respiratory specimen | 2019/2020             | Rhinovirus A | RV-A33   |                      | NA                | 27.5             |
| 5  | 6            | 47       | 2019/09                  | Respiratory specimen | 2019/2020             | Rhinovirus A | RV-A71   |                      | NA                | 23.68            |
| 6  | 7            | 23       | 2019/09                  | Respiratory specimen | 2019/2020             | Rhinovirus B | RV-B86   |                      | NA                | 28               |
| 7  | 8            | 46       | 2019/09                  | Respiratory specimen | 2019/2020             | Rhinovirus A | RV-A34   |                      | NA                | 31.25            |
| 8  | 9            | 18       | 2019/09                  | Respiratory specimen | 2019/2020             | Rhinovirus B | RV-B6    |                      | NA                | 29.4             |
| 9  | 10           | 59       | 2019/09                  | Respiratory specimen | 2019/2020             | Rhinovirus C | RV-C45   |                      | NA                | 28.07            |
| 10 | 11           | 50       | 2019/10                  | Respiratory specimen | 2019/2020             | Rhinovirus B | RV-B3    |                      | NA                | 29.38            |
| 11 | 12           | 62       | 2019/10                  | Respiratory specimen | 2019/2020             | Rhinovirus B | RV-B70   |                      | NA                | 23.43            |
| 12 | 13           | 45       | 2019/10                  | Respiratory specimen | 2019/2020             | Rhinovirus B | RV-B6    |                      | NA                | 29.38            |
| 13 | 15           | 61       | 2019/10                  | Respiratory specimen | 2019/2020             | Rhinovirus B | RV-B35   |                      | 33.55             | 26.8             |

|    |    |    |         |                      |           |               |              |       |       |
|----|----|----|---------|----------------------|-----------|---------------|--------------|-------|-------|
| 14 | 16 | 27 | 2019/10 | Respiratory specimen | 2019/2020 | Rhinovirus A  | RV-A2        | NA    | 31.06 |
| 14 | 17 | 52 | 2019/10 | Respiratory specimen | 2019/2020 | Rhinovirus A  | RV-A1        | NA    | 27.21 |
| 16 | 20 | 58 | 2019/10 | Respiratory specimen | 2019/2020 | Rhinovirus A  | RV-A49       | NA    | 31.02 |
| 17 | 22 | 59 | 2019/11 | Respiratory specimen | 2019/2020 | Rhinovirus A  | RV-A34       | NA    | 27.37 |
| 18 | 23 | 42 | 2019/11 | Respiratory specimen | 2019/2020 | Rhinovirus A  | RV-A1        | NA    | 28.67 |
| 19 | 25 | 57 | 2019/11 | Respiratory specimen | 2019/2020 | Rhinovirus B  | RV-B14       | NA    | 20.85 |
| 20 | 26 | 51 | 2019/11 | Respiratory specimen | 2019/2020 | Rhinovirus A  | RV-A80       | NA    | 24.66 |
| 21 | 27 | 16 | 2019/11 | Respiratory specimen | 2019/2020 | Rhinovirus B  | RV-B3        | NA    | 29.87 |
| 22 | 29 | 31 | 2019/11 | Respiratory specimen | 2019/2020 | Rhinovirus B  | RV-B3        | NA    | 32.35 |
| 23 | 32 | 46 | 2019/12 | Respiratory specimen | 2019/2020 | Rhinovirus B  | unclassified | NA    | 27.73 |
| 24 | 34 | 60 | 2019/12 | Respiratory specimen | 2019/2020 | Rhinovirus C  | RV-C42       | 32.96 | 27.74 |
| 25 | 36 | 46 | 2019/12 | Respiratory specimen | 2019/2020 | Rhinovirus A  | RV-A1        | NA    | 27.81 |
| 26 | 38 | 55 | 2019/12 | Respiratory specimen | 2019/2020 | Rhinovirus A  | RV-A32       | 36.08 | 24.26 |
| 27 | 39 | 52 | 2019/12 | Respiratory specimen | 2019/2020 | Rhinovirus A  | RV-A15       | NA    | 25.1  |
| 28 | 40 | 39 | 2019/12 | Respiratory specimen | 2019/2020 | Rhinovirus B  | RV-B14       | NA    | 27.39 |
| 29 | 41 | 89 | 2020/01 | Respiratory specimen | 2019/2020 | Rhinovirus A  | RV-A11       | NA    | 34.09 |
| 30 | 43 | 69 | 2020/01 | Respiratory specimen | 2019/2020 | Rhinovirus A  | RV-A11       | NA    | 25.66 |
| 31 | 51 | 61 | 2020/01 | Respiratory specimen | 2019/2020 | Rhinovirus A  | RV-A47       | NA    | 23.29 |
| 32 | 53 | 67 | 2020/02 | Other                | NA        | Rhinovirus A  | RV-A20       | NA    | 32.18 |
| 33 | 55 | 35 | 2020/02 | Respiratory specimen | 2019/2020 | Rhinovirus A  | RV-A53       | NA    | 29.05 |
| 34 | 56 | 63 | 2020/02 | Respiratory specimen | 2019/2020 | Rhinovirus A  | RV-A34       | NA    | 27.53 |
| 35 | 60 | 76 | 2020/02 | Respiratory specimen | 2019/2020 | Rhinovirus A  | RV-A24       | NA    | 25.29 |
| 36 | 64 | 17 | 2020/03 | Respiratory specimen | 2019/2020 | Rhinovirus B  | RV-B27       | NA    | 32.22 |
| 37 | 65 | 27 | 2020/03 | Respiratory specimen | 2019/2020 | Rhinovirus A  | RV-A60       | NA    | 19.63 |
| 38 | 69 | 39 | 2020/03 | Respiratory specimen | 2019/2020 | Rhinovirus A  | RV-A46       | NA    | 17.96 |
| 39 | 70 | 35 | 2020/03 | Respiratory specimen | 2019/2020 | Rhinovirus A  | RV-A31       | NA    | 23.58 |
| 40 | 71 | 76 | 2020/03 | Respiratory specimen | 2019/2020 | Rhinovirus C  | RV-C24       | 28.96 | 23.33 |
| 41 | 73 | 0  | 2019/07 | Stool                | NA        | Enterovirus A | EV-A71       | 29.01 | NA    |
| 42 | 74 | 1  | 2019/07 | Stool                | NA        | Enterovirus B | CVB5         | 24.68 | NA    |
| 43 | 75 | 1  | 2019/07 | Stool                | NA        | Enterovirus A | CVA10        | 22.68 | 40.72 |
| 44 | 76 | 0  | 2019/07 | Stool                | NA        | Enterovirus A | EV-A71       | 33.04 | NA    |
| 45 | 77 | 37 | 2019/07 | CSF                  | NA        | Enterovirus B | E25          | 34.31 | NA    |
| 46 | 78 | 0  | 2019/07 | Stool                | NA        | Enterovirus B | CVB5         | 30.73 | NA    |
| 47 | 79 | 37 | 2019/07 | CSF                  | NA        | Enterovirus B | CVB5         | 31.22 | NA    |
| 48 | 80 | 0  | 2019/07 | Stool                | NA        | Enterovirus B | CVB5         | 32.54 | NA    |
| 49 | 81 | 0  | 2019/09 | CSF                  | NA        | Enterovirus B | CVB5         | 33.67 | NA    |
| 50 | 82 | 1  | 2019/09 | Stool                | NA        | Enterovirus B | E6           | NA    | NA    |
| 51 | 84 | 1  | 2019/09 | Stool                | NA        | Enterovirus A | CVA6         | 22.49 | 38.1  |
| 52 | 86 | 30 | 2019/12 | Stool                | NA        | Enterovirus B | E20          | 34.75 | NA    |
| 53 | 87 | 0  | 2019/12 | Stool                | NA        | Enterovirus B | E7           | 35.32 | 27.54 |
| 54 | 88 | 0  | 2019/12 | Stool                | NA        | Enterovirus B | CVB4         | NA    | NA    |
| 55 | 90 | 0  | 2019/12 | CSF                  | NA        | Enterovirus B | E7           | NA    | NA    |
| 56 | 91 | 2  | 2019/12 | Stool                | NA        | Enterovirus B | E20          | 28.8  | NA    |
| 57 | 92 | 0  | 2019/12 | Stool                | NA        | Enterovirus A | CVA6         | 27.1  | NA    |
| 58 | 93 | 0  | 2019/12 | Stool                | NA        | Enterovirus A | CVA6         | 28.59 | NA    |
| 59 | 94 | 36 | 2020/01 | Stool                | NA        | Enterovirus B | E7           | 36.97 | NA    |
| 60 | 95 | 0  | 2020/05 | Stool                | NA        | Enterovirus B | E21          | 22.48 | 33.12 |
| 61 | 96 | 52 | 2020/11 | CSF                  | NA        | Enterovirus B | E30          | NA    | NA    |
| 62 | 98 | 0  | 2020/04 | Stool                | NA        | Enterovirus B | B27          | NA    | 31.31 |

|     |     |    |         |                      |           |               |        |               |       |
|-----|-----|----|---------|----------------------|-----------|---------------|--------|---------------|-------|
| 63  | 100 | 0  | 2022/10 | Stool                | NA        | Enterovirus B | CVA9   | 24.79         | NA    |
| 64  | 101 | 0  | 2022/10 | Stool                | NA        | Enterovirus B | E18    | 32.53         | NA    |
| 65  | 102 | 0  | 2022/10 | CSF                  | NA        | Enterovirus B | E18    | 38.32         | NA    |
| 66  | 104 | 0  | 2022/12 | Stool                | NA        | Enterovirus B | CVA9   | 31.71         | 39.54 |
| 67  | 105 | 4  | 2022/12 | Stool                | NA        | Enterovirus B | CVB3   | NA            | NA    |
| 68  | 106 | 1  | 2021/08 | Stool                | NA        | Enterovirus A | CVA10  | 22.85         | NA    |
| 69  | 107 | 0  | 2021/09 | Stool                | NA        | Enterovirus B | CVB4   | 34.82         | NA    |
| 70  | 108 | 0  | 2021/09 | CSF                  | NA        | Enterovirus B | CVB4   | 24.41         | NA    |
| 71  | 109 | 0  | 2021/09 | Stool                | NA        | Enterovirus B | CVB3   | 26.68         | NA    |
| 72  | 110 | 5  | 2021/09 | Stool                | NA        | Rhinovirus A  | RV-A53 | NA            | 29.15 |
| 73  | 111 | 1  | 2021/11 | Stool                | NA        | Enterovirus B | E6     | 33.92         | NA    |
| 74  | 112 | 0  | 2021/12 | Stool                | NA        | Enterovirus B | CVB3   | 29.95         | NA    |
| 75  | 113 | 73 | 2021/12 | CSF                  | NA        | Enterovirus A | CVA6   | 28.69         | NA    |
| 76  | 116 | 0  | 2022/05 | CSF                  | NA        | Enterovirus D | EV-D68 | 31.3          | NA    |
|     |     |    |         |                      |           |               |        | Norovirus GII |       |
| 77  | 117 | 0  | 2022/06 | CSF                  | NA        | Enterovirus B | E11    | 40.93         | NA    |
| 78  | 118 | 6  | 2021/07 | CSF                  | NA        | Enterovirus B | E6     | 35.11         | NA    |
| 79  | 119 | 0  | 2021/07 | Stool                | NA        | Enterovirus A | CVA4   | NA            | NA    |
| 80  | 120 | 0  | 2021/08 | Stool                | NA        | Enterovirus B | CVB3   | 27.6          | 35.07 |
| 81  | 121 | 0  | 2021/08 | Stool                | NA        | Enterovirus A | CVA6   | 26.58         | NA    |
| 82  | 123 | 49 | 2021/08 | CSF                  | NA        | Enterovirus B | CVB3   | NA            | NA    |
| 83  | 124 | 0  | 2022/07 | Stool                | NA        | Enterovirus B | CVB5   | 24.87         | NA    |
| 84  | 125 | 0  | 2022/07 | CSF                  | NA        | Enterovirus B | CVB5   | 33.25         | NA    |
| 85  | 126 | 0  | 2022/07 | Stool                | NA        | Enterovirus B | E25    | 30.26         | NA    |
| 86  | 127 | 0  | 2022/07 | CSF                  | NA        | Enterovirus B | CVB5   | 35.05         | NA    |
| 87  | 128 | 0  | 2022/07 | Stool                | NA        | Enterovirus B | CVB2   | 23.45         | NA    |
| 88  | 129 | 31 | 2022/08 | CSF                  | NA        | Enterovirus B | CVB4   | 35.64         | NA    |
| 89  | 130 | 0  | 2022/08 | Stool                | NA        | Enterovirus B | CVB1   | 29.24         | NA    |
| 90  | 131 | 1  | 2022/08 | Stool                | NA        | Enterovirus A | CVA10  | 21.99         | NA    |
| 91  | 132 | 71 | 2019/09 | Respiratory specimen | 2019/2020 | Rhinovirus A  | RV-A25 | NA            | 35.02 |
| 92  | 134 | 56 | 2019/09 | Respiratory specimen | 2019/2020 | Rhinovirus A  | RV-A1  | 37.63         | 20.87 |
| 93  | 135 | 73 | 2019/09 | Respiratory specimen | 2019/2020 | Rhinovirus A  | RV-A82 | NA            | 22.77 |
| 94  | 137 | 15 | 2019/09 | Respiratory specimen | 2019/2020 | Enterovirus B | CVB3   | NA            | NA    |
| 95  | 139 | 71 | 2019/09 | Respiratory specimen | 2019/2020 | Rhinovirus C  | RV-C41 | NA            | 33.4  |
| 96  | 140 | 25 | 2019/09 | Respiratory specimen | 2019/2020 | Rhinovirus B  | RV-B14 | NA            | 28.77 |
| 97  | 141 | 47 | 2019/09 | Respiratory specimen | 2019/2020 | Rhinovirus A  | RV-A22 | NA            | 25.87 |
| 98  | 142 | 41 | 2019/09 | Respiratory specimen | 2019/2020 | Rhinovirus B  | RV-B3  | NA            | 28.38 |
| 99  | 143 | 2  | 2019/09 | Respiratory specimen | 2019/2020 | Rhinovirus C  | RV-C43 | 26.5          | 19.11 |
| 100 | 144 | 69 | 2019/09 | Respiratory specimen | 2019/2020 | Rhinovirus A  | RV-A47 | NA            | 30.71 |
| 101 | 145 | 53 | 2019/09 | Respiratory specimen | 2019/2020 | Rhinovirus B  | RV-B70 | NA            | 22.66 |
| 102 | 146 | 58 | 2019/09 | Respiratory specimen | 2019/2020 | Rhinovirus A  | RV-A1  | 33.04         | 15.89 |
| 103 | 151 | 16 | 2019/10 | Respiratory specimen | 2019/2020 | Rhinovirus B  | RV-B27 | NA            | 29.71 |
| 104 | 152 | 27 | 2019/10 | Respiratory specimen | 2019/2020 | Rhinovirus B  | RV-B70 | NA            | 29.87 |
| 105 | 153 | 33 | 2019/10 | Respiratory specimen | 2019/2020 | Rhinovirus B  | RV-B14 | NA            | 32.94 |
| 106 | 154 | 83 | 2019/10 | Respiratory specimen | 2019/2020 | Rhinovirus A  | RV-A1  | NA            | 22.1  |
| 107 | 155 | 28 | 2019/10 | Respiratory specimen | 2019/2020 | Rhinovirus B  | RV-B3  | NA            | 28.67 |
| 108 | 156 | 21 | 2019/10 | Respiratory specimen | 2019/2020 | Rhinovirus A  | RV-A55 | NA            | 18.96 |
| 109 | 157 | 55 | 2019/10 | Respiratory specimen | 2019/2020 | Rhinovirus A  | RV-A57 | NA            | 24.81 |
| 110 | 158 | 60 | 2019/10 | Respiratory specimen | 2019/2020 | Rhinovirus B  | RV-B69 | NA            | 32.67 |
| 111 | 160 | 3  | 2019/10 | Respiratory specimen | 2019/2020 | Rhinovirus B  | RV-B48 | NA            | 25.01 |
| 112 | 162 | 43 | 2019/10 | Respiratory specimen | 2019/2020 | Rhinovirus C  | RV-C1  | NA            | 26.36 |
| 113 | 163 | 78 | 2019/10 | Respiratory specimen | 2019/2020 | Enterovirus D | EV-D68 | 24.56         | 31.13 |

|     |     |    |         |                      |           |               |         |        |       |       |
|-----|-----|----|---------|----------------------|-----------|---------------|---------|--------|-------|-------|
| 114 | 166 | 2  | 2019/11 | Respiratory specimen | 2019/2020 | Rhinovirus B  | RV-B91  |        | NA    | 27.42 |
| 115 | 168 | 36 | 2019/11 | Respiratory specimen | 2019/2020 | Rhinovirus A  | RV-A9   |        | NA    | 21.6  |
| 116 | 172 | 55 | 2019/11 | Respiratory specimen | 2019/2020 | Rhinovirus B  | RV-B26  |        | NA    | 25.88 |
| 117 | 175 | 55 | 2019/11 | Respiratory specimen | 2019/2020 | Rhinovirus A  | RV-A100 |        | NA    | 27.94 |
| 118 | 177 | 58 | 2019/11 | Respiratory specimen | 2019/2020 | Rhinovirus A  | RV-A66  |        | NA    | 35.12 |
| 119 | 179 | 27 | 2019/11 | Respiratory specimen | 2019/2020 | Rhinovirus C  | RV-C41  |        | NA    | 23.09 |
| 120 | 183 | 72 | 2019/12 | Respiratory specimen | 2019/2020 | Rhinovirus B  | RV-B91  |        | NA    | 27.08 |
| 121 | 185 | 0  | 2019/12 | Respiratory specimen | 2019/2020 | Rhinovirus A  | RV-A8   |        | NA    | 28.56 |
| 122 | 186 | 0  | 2019/12 | Respiratory specimen | 2019/2020 | Enterovirus B | CVB2    |        | 29.22 | 19.65 |
| 123 | 187 | 71 | 2019/12 | Respiratory specimen | 2019/2020 | Rhinovirus A  | RV-A56  |        | NA    | 31.21 |
| 124 | 188 | 6  | 2019/12 | Respiratory specimen | 2019/2020 | Rhinovirus B  | RV-B3   | RV-B86 | NA    | 23.6  |
| 125 | 189 | 54 | 2019/12 | Respiratory specimen | 2019/2020 | Rhinovirus B  | RV-B4   |        | NA    | 26.4  |
| 126 | 190 | 61 | 2019/12 | Respiratory specimen | 2019/2020 | Rhinovirus C  | RV-C11  |        | 39.17 | 20.6  |
| 127 | 191 | 60 | 2020/01 | Respiratory specimen | 2019/2020 | Rhinovirus C  | RV-C15  |        | NA    | 32.04 |
| 128 | 193 | 77 | 2020/01 | Respiratory specimen | 2019/2020 | Rhinovirus C  | RV-C15  |        | 25.8  | 17.23 |
| 129 | 195 | 29 | 2020/01 | Respiratory specimen | 2019/2020 | Rhinovirus B  | RV-B3   |        | NA    | 26.05 |
| 130 | 196 | 70 | 2020/01 | Respiratory specimen | 2019/2020 | Rhinovirus C  | RV-C53  |        | NA    | NA    |
| 131 | 198 | 51 | 2020/01 | Respiratory specimen | 2019/2020 | Rhinovirus A  | RV-A11  |        | NA    | 19.76 |
| 132 | 200 | 86 | 2020/01 | Respiratory specimen | 2019/2020 | Rhinovirus A  | RV-A34  |        | NA    | 22.66 |
| 133 | 201 | 64 | 2020/02 | Respiratory specimen | 2019/2020 | Rhinovirus A  | RV-A39  |        | NA    | 26.39 |
| 134 | 202 | 64 | 2020/02 | Respiratory specimen | 2019/2020 | Rhinovirus C  | RV-C33  |        | 37.87 | 37.9  |
| 135 | 206 | 58 | 2020/02 | Respiratory specimen | 2019/2020 | Rhinovirus B  | RV-B84  |        | NA    | 18.87 |
| 136 | 207 | 67 | 2020/02 | Respiratory specimen | 2019/2020 | Rhinovirus A  | RV-A20  |        | NA    | 23.72 |
| 137 | 211 | 73 | 2020/02 | Respiratory specimen | 2019/2020 | Rhinovirus A  | RV-A12  |        | NA    | 24.44 |
| 138 | 216 | 3  | 2020/03 | Respiratory specimen | 2019/2020 | Rhinovirus A  | RV-A28  |        | NA    | 27.84 |
| 139 | 217 | 44 | 2020/03 | Respiratory specimen | 2019/2020 | Rhinovirus C  | RV-C17  |        | 35.84 | 25.02 |
| 140 | 219 | 34 | 2021/07 | Respiratory specimen | 2021/2022 | Rhinovirus A  | RV-A15  |        | NA    | 17.66 |
| 141 | 223 | 33 | 2021/07 | Respiratory specimen | 2021/2022 | Rhinovirus A  | RV-A24  |        | NA    | 24.63 |
| 142 | 224 | 63 | 2021/07 | Respiratory specimen | 2021/2022 | Rhinovirus A  | RV-A61  |        | NA    | 14.99 |
| 143 | 225 | 27 | 2021/07 | Respiratory specimen | 2021/2022 | Rhinovirus A  | RV-A36  |        | 29.4  | 27.66 |
| 144 | 226 | 18 | 2021/07 | Respiratory specimen | 2021/2022 | Rhinovirus A  | RV-A31  |        | NA    | 28.84 |
| 145 | 227 | 72 | 2021/07 | Respiratory specimen | 2021/2022 | Rhinovirus B  | RV-B69  |        | 36.74 | 19.42 |
| 146 | 228 | 61 | 2021/07 | Respiratory specimen | 2021/2022 | Rhinovirus A  | RV-A24  |        | NA    | 27.81 |
| 147 | 229 | 1  | 2021/07 | Respiratory specimen | 2021/2022 | Enterovirus B | CVB3    |        | NA    | 34.94 |
| 148 | 230 | 49 | 2021/07 | Respiratory specimen | 2021/2022 | Rhinovirus A  | RV-A24  |        | NA    | 24.86 |
| 149 | 231 | 65 | 2021/07 | Respiratory specimen | 2021/2022 | Rhinovirus A  | RV-A34  |        | NA    | 35.19 |
| 150 | 233 | 54 | 2021/08 | Respiratory specimen | 2021/2022 | Rhinovirus A  | RV-A25  |        | NA    | 21    |

|     |     |    |         |                      |           |               |        |           |       |       |
|-----|-----|----|---------|----------------------|-----------|---------------|--------|-----------|-------|-------|
| 151 | 234 | 61 | 2021/08 | Respiratory specimen | 2021/2022 | Rhinovirus A  | RV-A31 | NA        | 31.44 |       |
| 152 | 235 | 23 | 2021/08 | Respiratory specimen | 2021/2022 | Rhinovirus A  | RV-A61 | NA        | 28.99 |       |
| 153 | 237 | 66 | 2021/08 | Respiratory specimen | 2021/2022 | Rhinovirus A  | RV-A65 | NA        | 25.87 |       |
| 154 | 239 | 19 | 2021/08 | Respiratory specimen | 2021/2022 | Rhinovirus B  | RV-B27 | NA        | 29.11 |       |
| 155 | 241 | 1  | 2021/08 | Other                | NA        | Enterovirus A | CVA6   | 20.4      | 41.01 |       |
| 156 | 242 | 31 | 2021/08 | Respiratory specimen | 2021/2022 | Rhinovirus A  | RV-A47 | NA        | 27.03 |       |
| 157 | 243 | 29 | 2021/08 | Respiratory specimen | 2021/2022 | Rhinovirus A  | RV-A47 | NA        | 20.06 |       |
| 158 | 244 | 64 | 2021/08 | Respiratory specimen | 2021/2022 | Rhinovirus A  | RV-A46 | NA        | 16.52 |       |
| 159 | 247 | 56 | 2021/08 | Respiratory specimen | 2021/2022 | Rhinovirus A  | RV-A24 | NA        | 26.47 |       |
| 160 | 249 | 50 | 2021/09 | Respiratory specimen | 2021/2022 | Rhinovirus A  | RV-A20 | NA        | 31.72 |       |
| 161 | 250 | 41 | 2021/09 | Respiratory specimen | 2021/2022 | Rhinovirus A  | RV-A58 | NA        | 24.84 |       |
| 162 | 251 | 65 | 2021/09 | Respiratory specimen | 2021/2022 | Enterovirus A | CVA6   | 34.54     | NA    |       |
| 163 | 253 | 50 | 2021/09 | Respiratory specimen | 2021/2022 | Rhinovirus A  | RV-A24 | NA        | 24.67 |       |
| 164 | 255 | 54 | 2021/09 | Respiratory specimen | 2021/2022 | Rhinovirus A  | RV-A47 | NA        | 25.04 |       |
| 165 | 256 | 0  | 2021/09 | Respiratory specimen | 2021/2022 | Rhinovirus A  | RV-A53 | NA        | 22.85 |       |
| 166 | 258 | 51 | 2021/09 | Respiratory specimen | 2021/2022 | Rhinovirus B  | RV-B42 | NA        | 20.46 |       |
| 167 | 259 | 4  | 2021/09 | Respiratory specimen | 2021/2022 | Rhinovirus C  | RV-C25 | 27.86     | 27.79 |       |
| 168 | 261 | 0  | 2021/09 | Other                | NA        | Enterovirus A | CVA6   | 21.59     | 42.79 |       |
| 169 | 263 | 43 | 2021/09 | Respiratory specimen | 2021/2022 | Rhinovirus A  | RV-A80 | NA        | 20.37 |       |
| 170 | 265 | 7  | 2021/10 | Respiratory specimen | 2021/2022 | Rhinovirus C  | RV-C1  | NA        | 25.35 |       |
| 171 | 266 | 1  | 2021/10 | Respiratory specimen | 2021/2022 | Enterovirus B | CVB2   | RV-A53    | NA    | 24.2  |
| 172 | 267 | 76 | 2021/10 | Respiratory specimen | 2021/2022 | Rhinovirus A  | RV-A25 | NA        | 23.09 |       |
| 173 | 268 | 70 | 2021/10 | Respiratory specimen | 2021/2022 | Rhinovirus A  | RV-A24 | NA        | 23.49 |       |
| 174 | 271 | 42 | 2021/10 | Respiratory specimen | 2021/2022 | Rhinovirus A  | RV-A85 | NA        | 33.2  |       |
| 175 | 272 | 19 | 2021/10 | Respiratory specimen | 2021/2022 | Rhinovirus A  | RV-A2  | NA        | 30.16 |       |
| 176 | 273 | 61 | 2021/10 | Respiratory specimen | 2021/2022 | Rhinovirus A  | RV-A78 | Bocavirus | 32.76 | 22.52 |
| 177 | 274 | 46 | 2021/10 | Respiratory specimen | 2021/2022 | Rhinovirus A  | RV-A31 | NA        | 24.4  |       |
| 178 | 275 | 54 | 2021/10 | Respiratory specimen | 2021/2022 | Rhinovirus A  | RV-A29 | NA        | 24.58 |       |
| 179 | 276 | 36 | 2021/10 | Respiratory specimen | 2021/2022 | Rhinovirus A  | RV-A47 | NA        | 27.88 |       |
| 180 | 277 | 1  | 2021/11 | Respiratory specimen | 2021/2022 | Enterovirus A | CVA6   | 20.31     | 39.05 |       |
| 181 | 278 | 32 | 2021/11 | Respiratory specimen | 2021/2022 | Rhinovirus B  | RV-B83 | NA        | 31.69 |       |
| 182 | 281 | 36 | 2021/11 | Respiratory specimen | 2021/2022 | Rhinovirus B  | RV-B3  | NA        | 31.27 |       |
| 183 | 283 | 70 | 2021/11 | Respiratory specimen | 2021/2022 | Rhinovirus C  | RV-C11 | NA        | 25.51 |       |
| 184 | 285 | 64 | 2021/11 | Respiratory specimen | 2021/2022 | Rhinovirus B  | RV-B83 | NA        | 25.57 |       |
| 185 | 286 | 58 | 2021/11 | Respiratory specimen | 2021/2022 | Rhinovirus A  | RV-A46 | 31        | 27.9  |       |
| 186 | 288 | 53 | 2021/11 | Respiratory specimen | 2021/2022 | Rhinovirus A  | RV-A47 | NA        | 23.81 |       |
| 187 | 289 | 0  | 2021/11 | Respiratory specimen | 2021/2022 | Rhinovirus A  | RV-A78 | 43.22     | 19.44 |       |
| 188 | 290 | 66 | 2021/11 | Respiratory specimen | 2021/2022 | Rhinovirus C  | RV-C1  | NA        | 19.79 |       |

|     |     |    |         |                      |           |               |        |       |       |
|-----|-----|----|---------|----------------------|-----------|---------------|--------|-------|-------|
| 189 | 293 | 2  | 2021/12 | Respiratory specimen | 2021/2022 | Enterovirus D | EV-D68 | 40.55 | NA    |
| 190 | 294 | 51 | 2021/12 | Respiratory specimen | 2021/2022 | Rhinovirus A  | RV-A47 | NA    | 27.45 |
| 191 | 302 | 43 | 2021/12 | Respiratory specimen | 2021/2022 | Rhinovirus C  | RV-C51 | NA    | 39.36 |
| 192 | 303 | 41 | 2021/12 | Respiratory specimen | 2021/2022 | Rhinovirus A  | RV-A47 | NA    | 25.32 |
| 193 | 304 | 0  | 2021/12 | Respiratory specimen | 2021/2022 | Rhinovirus A  | RV-A57 | NA    | 28.31 |
| 194 | 305 | 1  | 2021/12 | Respiratory specimen | 2021/2022 | Enterovirus A | CVA6   | 23.21 | 43.03 |
| 195 | 309 | 64 | 2022/01 | Respiratory specimen | 2021/2022 | Rhinovirus B  | RV-B69 | NA    | 29.11 |
| 196 | 310 | 49 | 2022/01 | Respiratory specimen | 2021/2022 | Rhinovirus C  | RV-C56 | NA    | 27.7  |
| 197 | 313 | 52 | 2022/01 | Respiratory specimen | 2021/2022 | Rhinovirus A  | RV-A15 | NA    | 25.1  |
| 198 | 321 | 68 | 2022/02 | Respiratory specimen | 2021/2022 | Rhinovirus A  | RV-A59 | NA    | NA    |
| 199 | 324 | 70 | 2022/02 | Respiratory specimen | 2021/2022 | Rhinovirus A  | RV-A46 | NA    | 29.31 |
| 200 | 325 | 26 | 2022/02 | Respiratory specimen | 2021/2022 | Rhinovirus A  | RV-A59 | NA    | 25.29 |
| 201 | 327 | 65 | 2022/02 | Respiratory specimen | 2021/2022 | Rhinovirus C  | RV-C1  | NA    | 32.74 |
| 202 | 331 | 55 | 2022/03 | Respiratory specimen | 2021/2022 | Rhinovirus A  | RV-A31 | NA    | 35.98 |
| 203 | 332 | 59 | 2022/03 | Respiratory specimen | 2021/2022 | Rhinovirus C  | RV-C1  | NA    | 24.61 |
| 204 | 333 | 1  | 2022/03 | Other                | NA        | Enterovirus A | CVA6   | 18.93 | 39.38 |
| 205 | 334 | 34 | 2022/03 | Respiratory specimen | 2021/2022 | Rhinovirus C  | RV-C5  | NA    | 27.49 |
| 206 | 337 | 61 | 2022/03 | Respiratory specimen | 2021/2022 | Rhinovirus A  | RV-A85 | NA    | 26.29 |
| 207 | 338 | 68 | 2022/03 | Respiratory specimen | 2021/2022 | Rhinovirus A  | RV-A11 | NA    | 25.29 |
| 208 | 340 | 70 | 2022/03 | Respiratory specimen | 2021/2022 | Rhinovirus A  | RV-A24 | NA    | 33.92 |
| 209 | 341 | 1  | 2022/03 | Respiratory specimen | 2021/2022 | Enterovirus A | CVA6   | 21.62 | 39.45 |
| 210 | 343 | 42 | 2022/04 | Respiratory specimen | 2021/2022 | Rhinovirus A  | RV-A58 | NA    | 28.52 |
| 211 | 345 | 31 | 2022/04 | Respiratory specimen | 2021/2022 | Enterovirus A | CVA10  | 33.63 | NA    |
| 212 | 346 | 55 | 2022/04 | Respiratory specimen | 2021/2022 | Enterovirus A | CVA10  | NA    | NA    |
| 213 | 347 | 66 | 2022/04 | Respiratory specimen | 2021/2022 | Enterovirus A | CVA10  | NA    | 36.18 |
| 214 | 348 | 69 | 2022/04 | Respiratory specimen | 2021/2022 | Enterovirus A | CVA6   | NA    | 29.91 |
| 215 | 349 | 36 | 2022/04 | Respiratory specimen | 2021/2022 | Rhinovirus C  | C45    | NA    | NA    |
| 216 | 351 | 70 | 2022/04 | Respiratory specimen | 2021/2022 | Enterovirus B | CVB3   | NA    | 21.8  |
| 217 | 355 | 0  | 2022/04 | Respiratory specimen | 2021/2022 | Rhinovirus C  | C42    | 28.4  | 22.66 |
| 218 | 358 | 1  | 2022/07 | Other                | NA        | NA            | NA     | 18.9  | 41.53 |
| 219 | 361 | 56 | 2019/12 | Respiratory specimen | 2019/2020 | Rhinovirus C  | RV-C26 | NA    | 27.38 |
| 220 | 362 | 0  | 2020/02 | Respiratory specimen | 2019/2020 | Rhinovirus B  | RV-B72 | NA    | 36.69 |
| 221 | 363 | 73 | 2022/03 | CSF                  | NA        | Rhinovirus C  | RV-C11 | NA    | NA    |
| 222 | 364 | 53 | 2020/02 | Respiratory specimen | 2019/2020 | Rhinovirus A  | RV-A12 | NA    | 30.02 |
| 223 | 365 | 36 | 2021/09 | Respiratory specimen | 2021/2022 | Rhinovirus A  | RV-A36 | NA    | NA    |
| 224 | 367 | 0  | 2021/11 | Respiratory specimen | 2021/2022 | NA            | NA     | NA    | 22.86 |
| 225 | 369 | 78 | 2019/10 | Respiratory specimen | 2019/2020 | NA            | NA     | NA    | 19.21 |
| 226 | 370 | 15 | 2019/12 | Respiratory specimen | 2019/2020 | NA            | NA     | NA    | 26.59 |
| 227 | 371 | 76 | 2019/12 | Respiratory specimen | 2019/2020 | Rhinovirus A  | RV-A36 | NA    | 30.95 |

|     |     |    |         |                      |           |               |        |        |       |
|-----|-----|----|---------|----------------------|-----------|---------------|--------|--------|-------|
| 228 | 373 | 63 | 2020/02 | Respiratory specimen | 2019/2020 | NA            | NA     | 36.57  | 27.24 |
| 229 | 374 | 58 | 2020/03 | Respiratory specimen | 2019/2020 | NA            | NA     | NA     | 27.87 |
| 230 | 375 | 0  | 2022/05 | Stool                | NA        | NA            | NA     | 27.76  | NA    |
| 231 | 376 | 9  | 2019/09 | Respiratory specimen | 2019/2020 | NA            | NA     | NA     | 26.66 |
| 232 | 380 | 63 | 2019/10 | Respiratory specimen | 2019/2020 | NA            | NA     | NA     | 29.88 |
| 233 | 382 | 69 | 2019/11 | Respiratory specimen | 2019/2020 | Rhinovirus C  | RV-C12 | 30     | 19.66 |
| 234 | 383 | 75 | 2019/11 | Respiratory specimen | 2019/2020 | NA            | NA     | NA     | 28.59 |
| 235 | 384 | 68 | 2019/11 | Respiratory specimen | 2019/2020 | NA            | NA     | NA     | 22.67 |
| 236 | 386 | 68 | 2019/12 | Respiratory specimen | 2019/2020 | Rhinovirus C  | RV-C43 | 33.53  | 26.87 |
| 237 | 387 | 57 | 2019/12 | Respiratory specimen | 2019/2020 | NA            | NA     | NA     | 26.43 |
| 238 | 388 | 6  | 2020/01 | Respiratory specimen | 2019/2020 | NA            | NA     | 37.19  | 25.02 |
| 239 | 389 | 5  | 2020/02 | Respiratory specimen | 2019/2020 | Rhinovirus A  | RV-A78 | NA     | 22.61 |
| 240 | 390 | 0  | 2020/02 | Respiratory specimen | 2019/2020 | Rhinovirus C  | RV-C7  | 35.1   | 26.72 |
| 241 | 391 | 0  | 2020/02 | Respiratory specimen | 2019/2020 | NA            | NA     | NA     | 26.93 |
| 242 | 392 | 3  | 2020/03 | Respiratory specimen | 2019/2020 | NA            | NA     | NA     | 29    |
| 243 | 393 | 50 | 2021/07 | Respiratory specimen | 2021/2022 | Rhinovirus A  | RV-A24 | NA     | 24.39 |
| 244 | 398 | 20 | 2021/12 | Respiratory specimen | 2021/2022 | NA            | NA     | NA     | 28.15 |
| 245 | 399 | 79 | 2021/12 | Respiratory specimen | 2021/2022 | Rhinovirus A  | RV-A20 | NA     | 21.75 |
| 246 | 401 | 52 | 2022/02 | Respiratory specimen | 2021/2022 | Rhinovirus A  | RV-A25 | NA     | 27.79 |
| 247 | 402 | 69 | 2022/02 | Respiratory specimen | 2021/2022 | Rhinovirus A  | RV-A15 | NA     | 27.59 |
| 248 | 403 | 24 | 2022/02 | Respiratory specimen | 2021/2022 | NA            | NA     | NA     | 29.69 |
| 249 | 405 | 42 | 2022/03 | Respiratory specimen | 2021/2022 | Rhinovirus A  | RV-A30 | NA     | 32.19 |
| 250 | 406 | 28 | 2022/04 | Respiratory specimen | 2021/2022 | Rhinovirus A  | RV-A58 | RV-A59 | NA    |
| 251 | 407 | 58 | 2022/04 | Respiratory specimen | 2021/2022 | Rhinovirus B  | RV-B72 | NA     | 26.68 |
| 252 | 408 | 50 | 2022/04 | Respiratory specimen | 2021/2022 | Rhinovirus A  | RV-A12 | NA     | 25.62 |
| 253 | 409 | 0  | 2022/04 | Respiratory specimen | 2021/2022 | Rhinovirus A  | RV-A36 | NA     | 27.81 |
| 254 | 411 | 52 | 2022/04 | Respiratory specimen | 2021/2022 | NA            | NA     | NA     | 29.32 |
| 255 | 412 | 37 | 2022/06 | Other                | NA        | Enterovirus A | CVA10  | 30.38  | NA    |
